1 April 30, 2021

2

3

4

5

6

7 **Detecting natural selection in trait-trait coevolution**

8

9 Daohan Jiang and Jianzhi Zhang\*

10

11 Department of Ecology and Evolutionary Biology, University of Michigan, Ann Arbor,

12 Michigan 48109, USA

13

14

15

16

17 \*Correspondence to

18 Jianzhi Zhang

19 Department of Ecology and Evolutionary Biology

20 University of Michigan

21 4018 Biological Sciences Building

22 1105 North University Avenue

23 Ann Arbor, MI 48109, USA

24 Phone: 734-763-0527

25 Fax: 734-763-0544

26 Email: [jianzhi@umich.edu](mailto:jianzhi@umich.edu)

27

28

29

30

31 **Running title:** Selection in trait-trait coevolution

32

33 **Keywords:** fly, morphology, mutation, modularity, pleiotropy, yeast

34

35

36

37

38

39 **ABSTRACT**

40           No phenotypic trait evolves independently of all other traits, but the cause of trait-trait  
41 coevolution is poorly understood. While the coevolution could arise simply from pleiotropic  
42 mutations that simultaneously affect the traits concerned, it could also result from multivariate  
43 natural selection favoring certain trait relationships. To gain a general mechanistic  
44 understanding of trait-trait coevolution, we examine the evolution of 220 cell morphology traits  
45 across 16 natural strains of the yeast *Saccharomyces cerevisiae* and the evolution of 24 wing  
46 morphology traits across 110 fly species of the family Drosophilidae, along with the variations of  
47 these traits among gene deletion or mutation accumulation lines (a.k.a. mutants). For numerous  
48 trait pairs, the phenotypic correlation among evolutionary lineages differs significantly from that  
49 among mutants. Specifically, we find hundreds of cases where the evolutionary correlation  
50 between traits is strengthened or reversed relative to the mutational correlation, which, according  
51 to our population genetic simulation, is likely caused by multivariate selection. Furthermore, we  
52 detect selection for enhanced modularity of the yeast traits analyzed. Together, these results  
53 demonstrate that trait-trait coevolution is shaped by natural selection and suggest that the  
54 pleiotropic structure of mutation is not optimal. Because the morphological traits analyzed here  
55 are chosen largely because of their measurability, our conclusion is likely general.

56

## 57 INTRODUCTION

58 Many phenotypic traits covary during evolution. For example, the logarithm of brain  
59 weight and that of body weight show a nearly perfect linear relationship across mammals  
60 (Gould, 1966; Huxley, 1972; Lande, 1979). In theory, three processes may explain such trait-  
61 trait coevolution. First, it could arise simply from pleiotropic mutations that simultaneously  
62 influence these traits with a more or less constant ratio of effects (Lande, 1980; G. P. Wagner,  
63 1989; G. P. Wagner & Zhang, 2011). Second, trait covariation could arise from the linkage  
64 disequilibrium between genes controlling these traits (Gardner & Latta, 2007; Lande, 2007;  
65 Saltz, Hessel, & Kelly, 2017; G. P. Wagner & Zhang, 2011), but such trait covariation is  
66 expected to be restricted to closely related individuals due to the deterioration of linkage  
67 disequilibrium as a result of recombination. If the linkage disequilibrium is stably maintained  
68 due to, for example, chromosomal inversion, the involved linked genes can be regarded as a  
69 supergene with mutational pleiotropy (Saltz et al., 2017). For this reason, linkage disequilibrium  
70 is negligible except for trait covariation among closely related individuals. Third, trait  
71 covariation could be a result of natural selection for particular trait relationships that are  
72 advantageous (Bolstad et al., 2015; Lande, 1979; Roff, Mostowj, & Fairbairn, 2002; Shoval et  
73 al., 2012; Sinervo & Svensson, 2002; Svensson et al., 2021).

74 Despite a long-standing interest in trait correlation in evolution (Lande, 1979; Saltz et al.,  
75 2017; G. P. Wagner & Altenberg, 1996), which is also referred to as phenotypic integration in  
76 the literature (Olson & Miller, 1999; Pigliucci, 2003), our understanding of the roles of mutation  
77 and selection in trait-trait coevolution remains limited. Most studies on the subject focused on a  
78 small number of traits that are physiologically or ecologically important (Kingsolver et al.,  
79 2001), such as skull anatomy characters (Fabre et al., 2020; Goswami, Smaers, Soligo, & Polly,  
80 2014; Navalon, Marugan-Lobon, Bright, Cooney, & Rayfield, 2020; Porto et al., 2015; Simon,  
81 Machado, & Marroig, 2016; Watanabe et al., 2019), behavioral syndrome (i.e., sets of correlated  
82 behavioral traits) (Dochtermann & Dingemans, 2013; Sih, Bell, & Johnson, 2004), and  
83 ecological or organismal traits correlated with the metabolic rate (Brown, Gillooly, Allen,  
84 Savage, & West, 2004; Glazier, 2010; Martin, 1981; Pettersen, White, & Marshall, 2016; White  
85 et al., 2019); hence, they may not provide a general, unbiased picture of trait-trait coevolution.  
86 Additionally, it is the trait correlation resulting from standing genetic variation and its effect on  
87 adaptation that have received the most attention (Agrawal & Stinchcombe, 2009; Arnold,

88 Burger, Hohenlohe, Ajie, & Jones, 2008; Blows & McGuigan, 2015; Schluter, 1996; Stepan,  
89 Phillips, & Houle, 2002; Walsh & Blows, 2009; Walter, Aguirre, Blows, & Ortiz-Barrientos,  
90 2018). But, because standing genetic variation could have been influenced by selection, the  
91 resulting trait correlation may not inform the correlation produced by mutation. Not knowing the  
92 mutational correlation hinders a full understanding of the contribution of selection.

93 Related to trait-trait correlation is the concept of modularity. It has been hypothesized  
94 that it is beneficial for organisms to have a modular organization such that functionally related  
95 traits belonging to the same module covary (Goswami et al., 2014; G. P. Wagner, 1999; G. P.  
96 Wagner & Altenberg, 1996; G. P. Wagner, Pavlicev, & Cheverud, 2007). Although modularity  
97 is a well-recognized feature of many trait correlation networks, the relative contribution of  
98 selection and mutational pleiotropy to modularity has not been assessed at the phenome scale (G.  
99 P. Wagner et al., 2007; Wang, Liao, & Zhang, 2010).

100 To gain a general mechanistic understanding of trait-trait coevolution, we study the  
101 phenotypic correlations for a large number of trait pairs at the levels of mutation and long-term  
102 evolution; natural selection is inferred when the evolutionary correlation between traits cannot be  
103 fully explained by the mutational correlation. Our primary data include 220 cell morphology  
104 traits of the budding yeast *Saccharomyces cerevisiae* that have been measured in 4817 single-  
105 gene deletion lines (Ohya et al., 2005), 89 mutation accumulation (MA) lines (for a subset of 187  
106 traits) (Geiler-Samerotte, Zhu, Goulet, Hall, & Siegal, 2016), and 16 natural strains with clear  
107 phylogenetic relationships (Ohya et al., 2005; Yvert et al., 2013). These traits were quantified  
108 from fluorescent microscopic images of triple-stained cells and were originally chosen for study  
109 because of their measurability regardless of potential roles in evolution and adaptation (Ohya et  
110 al., 2005). Subsequent studies found that these traits are correlated with the yeast mitotic growth  
111 rate to varying extents (Ho & Zhang, 2014). Hence, these traits may be considered  
112 representatives of phenotypic traits that have different contributions to fitness. Previous analyses  
113 of these traits among natural strains unveiled signals of positive selection on individual traits  
114 (Ho, Ohya, & Zhang, 2017), but their potential coevolution has not been studied. While studying  
115 these trait pairs can offer a general picture of trait-trait coevolution, we recognize that the  
116 selection agent would be hard to identify should selection be detected because the biological  
117 functions of these traits (other than correlations with the growth rate) are generally unknown (Ho  
118 et al., 2017). To verify the generality of the findings from the yeast traits, we analyze another

119 dataset that includes 12 landmark vein intersections on the fly wings that have been measured in  
120 150 MA lines of *Drosophila melanogaster* (Houle & Fierst, 2013) and 110 Drosophilid species  
121 (Houle, Bolstad, van der Linde, & Hansen, 2017). Because each intersection is described by two  
122 coordinates, which are counted as two traits, there are 24 traits in this dataset. In both datasets,  
123 we discover that the evolutionary correlation differs significantly from the mutational correlation  
124 for numerous trait pairs, revealing a role of natural selection in trait-trait coevolution. We also  
125 provide evidence for selection for enhanced modularity of the yeast traits.

126

## 127 **RESULTS**

### 128 **Evolutionary correlations differ from mutational correlations for many trait pairs**

129 To investigate if trait correlations in evolution can be fully accounted for by the  
130 correlations generated by mutation, we examined all pairs of the 220 yeast cell morphology traits  
131 previously measured. For each pair of traits, we computed the mutational correlation  $COR_M$ ,  
132 defined as Pearson's correlation coefficient across 4,817 gene deletion lines (upper triangle in  
133 **Fig. 1A, Data S1**), and evolutionary correlation  $COR_E$ , defined as Pearson's correlation  
134 coefficient across 16 natural strains (lower triangle in **Fig. 1A, Data S1**) with their phylogenetic  
135 relationships (**Fig. S1**) taken into account (see Materials and Methods). Note that the original  
136 data contained 37 natural strains (Yvert et al., 2013), of which 21 belong to the “mosaic” group  
137 (Liti et al., 2009; Peter et al., 2018)—their phylogenetic relationships with other *S. cerevisiae*  
138 strains vary among genomic regions—so cannot be included in our analysis that requires  
139 considering phylogenetic relationships (Mendes, Fuentes-Gonzalez, Schraiber, & Hahn, 2018).  
140 For each pair of traits, a neutral distribution of  $COR_E$  was generated by simulating 1,000 times  
141 the neutral evolution of the traits under a multivariate Brownian motion model with the observed  
142 mutational (co)variance matrix  $M$  used as the mutational input, because, under neutrality, the  
143 expected evolutionary divergence along a dimension in the phenotypic space is proportional of  
144 the mutational variance along that dimension (Hohenlohe & Arnold, 2008; Lande, 1979; Lynch  
145 & Hill, 1986). A significant difference from  $COR_M$  ( $P < 0.05$ ) was inferred when the observed  
146  $COR_E$  falls in the left or right 2.5% tail of the null distribution of  $COR_E$ . Note that the above test  
147 has two limitations. First, it assumes that  $M$  is invariant among the natural strains examined such  
148 that a significant difference between  $COR_E$  and  $COR_M$  is caused by selection in trait-trait  
149 coevolution instead of  $M$  evolution. Second, our test cannot detect strain-specific selection on

150 trait correlation, because  $COR_E$  captures only the common pattern of trait correlation across the  
151 natural strains examined. Before conducting the test, we confirmed that the sampling error of  
152 our estimated  $M$  is negligible, likely because of the large number of mutants used in  $M$   
153 estimation (**Table S1**; see Materials and Methods).

154 We found that the frequency distribution of  $COR_E$  across all trait pairs differs  
155 significantly from that of  $COR_M$  (**Fig. S2A**), suggesting the action of selection. Of the 24,090  
156 trait pairs examined, 1,215 pairs (or 5.04%) showed a significantly different  $COR_E$  when  
157 compared with its neutral expectation from  $COR_M$ , at the false discovery rate (FDR) of 5%  
158 (**Table 1, Data S1**), indicating that natural selection has shaped the coevolution of many trait  
159 pairs. To investigate whether the above result is biased because of the use of each trait in many  
160 trait pairs, we randomly arranged the 220 traits into 110 non-overlapping pairs and counted the  
161 number of pairs with  $COR_E$  significantly different from  $COR_M$ . This was repeated 1,000 times to  
162 yield 1000 estimates of the proportion of trait pairs with significantly different  $COR_E$  and  $COR_M$ .  
163 The middle 95% of these estimates ranged from 1.82% to 9.09%, with the median estimate being  
164 4.55%. Hence, there is no indication that using overlapping trait pairs has biased the estimate of  
165 the fraction of trait pairs with significantly different  $COR_E$  and  $COR_M$ .

166 We divided the 1,215 cases of significantly different  $COR_E$  and  $COR_M$  into three  
167 categories. In the first category, the trait correlation generated by mutation is strengthened by  
168 natural selection during evolution. A total of 393 trait pairs are considered to belong to this  
169 “strengthened” category (**Table 1**) because they satisfy the following criteria:  $COR_E$  and  $COR_M$   
170 have the same sign and  $|COR_E| > |COR_M|$ , or  $COR_E$  and  $COR_M$  have different signs but only  
171  $COR_E$  is significantly different from 0 (at the nominal  $P$ -value of 0.05) (**Fig. 1B**). In the second  
172 category, the trait correlation generated by mutation is weakened by natural selection during  
173 evolution. One hundred and forty-five trait pairs satisfying the following criteria are classified  
174 into this “weakened” category (**Table 1**):  $COR_E$  and  $COR_M$  have the same sign and  $|COR_E| <$   
175  $|COR_M|$ , or  $COR_E$  and  $COR_M$  have different signs but only  $COR_M$  is significantly different from  
176 0 (**Fig. 1C**). In the last category, the trait correlation generated by mutation is reversed in sign  
177 by natural selection during evolution. Six hundred and seventy-seven trait pairs satisfying the  
178 following criteria are in this “reversed” category (**Table 1**):  $COR_E$  and  $COR_M$  have different  
179 signs and are both significantly different from 0 (**Fig. 1D**).

180 To assess the robustness of the selection signals detected, we repeated the above analysis  
181 using  $COR_M$  estimated from 89 mutation accumulation (MA) lines (Geiler-Samerotte et al.,  
182 2016) (**Fig. S3A, Data S1**). Again, the overall frequency distribution across all trait pairs differs  
183 significantly between  $COR_E$  and  $COR_M$  (**Fig. S2B**). We found that 1,718 trait pairs exhibit a  
184 significantly different  $COR_E$  from its neutral expectation (**Table 1, Data S1**), supporting a role of  
185 selection in the coevolution of many trait pairs. When comparing the analysis using  $COR_M$  from  
186 gene deletion lines and that using  $COR_M$  from MA lines, we found 429 trait pairs to exhibit  
187 selection signals and fall into the same category in both analyses, including 85 pairs in the  
188 “strengthened” category, 18 pairs in the “weakened” category, and 326 pairs in the “reversed”  
189 category. All of these numbers substantially exceed the corresponding expected random  
190 overlaps (3.4, 0.1, and 54.9, respectively;  $P < 0.001$  based on 1000 random draws in each case),  
191 suggesting the reliability of both analyses. Although mutations in MA lines are more natural  
192 than those in gene deletion lines, the number of MA lines is much smaller than the number of  
193 gene deletion lines and only 187 of the original 220 traits were measured in the MA lines. For  
194 these reasons, we focused on the  $COR_M$  estimated from the gene deletion lines in subsequent  
195 analyses.

196 To examine the generality of the above yeast-based findings, we analyzed the 24 wing  
197 morphology traits of *Drosophilid* flies. The  $COR_M$  and  $COR_E$  have been previously estimated  
198 from 150 MA lines (Houle & Fierst, 2013) and 110 *Drosophilid* fly species (Houle et al., 2017),  
199 respectively (**Fig. S3B, Data S1**). The overall frequency distribution across all trait pairs differs  
200 significantly between  $COR_E$  and  $COR_M$  (**Fig. S2C**). Of the 276 pairs of traits, 152 showed a  
201 significantly different  $COR_E$  from its neutral expectation generated by simulating neutral  
202 evolution with the estimated  $COR_M$  (**Table 1, Data S1**), suggesting widespread actions of  
203 selection in the coevolution of fly wing morphology traits.

204 Together, these results demonstrate that, for many trait pairs, mutational and evolutionary  
205 correlations between morphological traits are more different than expected under neutrality.  
206 This observation suggests an important role of selection in shaping the strength and/or direction  
207 of trait correlation in evolution.

208

209 **Effects of different selection regimes on trait-trait coevolution**

210 The strengthened, weakened, and reversed trait correlations in evolution may have  
211 resulted from different selection regimes. Below we consider various selection regimes that  
212 could potentially explain these types of difference between  $COR_M$  and  $COR_E$  (**Fig. 2**). First,  
213 when a specific allometric relationship between two traits is selectively favored, the population  
214 mean trait values are expected to be concentrated near the fitness ridge or the optimal allometric  
215 line, resulting in a strong evolutionary correlation between the traits (i.e., a high  $|COR_E|$ ) (**Fig.**  
216 **2A**). Unless  $COR_M$  is already similar to  $COR_E$ , we expect to see strengthened or reversed  $COR_E$   
217 depending on  $COR_M$ . Second, if there is a single fitness peak for an optimal combination of trait  
218 values and if there is sufficiently strong stabilizing selection on the optimal phenotype, the  
219 population mean phenotype should be restricted within a small range of the optimal phenotype in  
220 all directions in the phenotypic space regardless of the mutational variance. Consequently,  
221  $COR_E$  is expected to be close to 0, which could account for a weakened evolutionary correlation  
222 relative to the mutational correlation (**Fig. 2B**). Finally, if the fitness optimum varies across  
223 lineages in a random fashion, the steady-state  $COR_E$  will be close to zero, potentially leading to  
224 the weakening of the evolutionary correlation relative to the mutational correlation (**Fig. 2C**).

225 To verify these predictions, we simulated the evolution of two traits. Under each  
226 parameter set, we simulated 50 independent replicate lineages and computed the correlation  
227 coefficient, or  $COR_E$ , between the traits across the replicate lineages at the end of the simulated  
228 evolution. This was repeated 200 times to obtain an empirical distribution of  $COR_E$ . To evaluate  
229 the difference between  $COR_M$  and  $COR_E$ , we examined the location of  $COR_M$  in the distribution  
230 of  $COR_E$ ; a significant ( $P < 0.05$ ) difference is inferred if  $COR_M$  is in the left or right 2.5% tail of  
231 the  $COR_E$  distribution.

232 As expected, in the absence of selection, the distribution of  $COR_E$  is centered around  
233  $COR_M$  (first block in **Table 2**). When a specific allometric relationship is selectively favored, a  
234 high  $|COR_E|$  always emerges regardless of the  $COR_M$  used, resulting in either strengthened or  
235 reversed evolutionary correlations ( $P < 0.005$  for all parameter sets examined; the second to fifth  
236 blocks in **Table 2**). By contrast, stabilizing selection of an optimal phenotype leads to weakened  
237 correlation across replicate lineages when  $|COR_M|$  is not small (sixth block in **Table 2**). Finally,  
238 when different lineages have different phenotypic optima that are randomly picked from the  
239 standard bivariate normal distribution, weakened evolutionary correlations are generally  
240 observed except when  $COR_M$  is close to zero (bottom block in **Table 2**). These results suggest



241 that the strengthened and reversed evolutionary correlations of yeast and fly morphological traits  
242 are likely caused by selections of allometric relationships, while the weakened correlations are  
243 likely caused by selections of individual traits either when there is a single optimal phenotype or  
244 when the optimal phenotype randomly varies among lineages.

245

### 246 **Selection for enhanced modularity of yeast morphological traits**

247 While all of the above analyses focused on individual trait pairs, here we ask whether the  
248 overall trait correlation across divergent lineages is stronger or weaker than that created by  
249 mutation. As a measure of the overall level of trait correlation (i.e., overall integration), we  
250 calculated the variance of eigenvalues ( $V_{\text{eigen}}$ ) of the correlation matrix from divergent lineages  
251 and mutants, respectively. A greater  $V_{\text{eigen}}$  corresponds to a stronger overall correlation between  
252 traits because the eigenvalues become less evenly distributed as the absolute values of the  
253 correlation coefficients become larger (Pavlicev, Cheverud, & Wagner, 2009). However, the  
254 sample size (i.e., the number of strains) in the estimation of the correlation matrix also has an  
255 effect on  $V_{\text{eigen}}$ ; a matrix estimated from a smaller sample naturally tends to have fewer positive  
256 eigenvalues and greater  $V_{\text{eigen}}$ . To control this factor, we used 1,000 control datasets generated  
257 by simulating neutral evolution to derive an empirical null distribution of  $V_{\text{eigen}}$  and examined the  
258 location of the observed  $V_{\text{eigen}}$  in this distribution (see Materials and Methods).

259 For the yeast traits,  $V_{\text{eigen}}$  of the observed evolutionary correlation matrix exceeds that in  
260 90.8% of simulated datasets ( $P = 0.184$  in a two-tailed test; **Table 3**), meaning that the overall  
261 evolutionary correlation between traits is not significantly different from the overall mutational  
262 correlation. For the fly traits,  $V_{\text{eigen}}$  of the evolutionary correlation matrix exceeds that in 99% of  
263 simulated datasets ( $P = 0.02$  in a two-tailed test; **Table 3**), suggesting that the overall  
264 evolutionary correlation between traits is stronger than the overall mutational correlation. We  
265 also compared the overall integration between yeast and flies using  $V_{\text{eigen}}/(n-1)$ , where  $n$  is the  
266 number of traits examined.  $V_{\text{eigen}}/(n-1)$  equals 0.204 and 0.268 for the yeast mutational and  
267 evolutionary matrices, respectively, whereas the corresponding values in flies are 0.153 and  
268 0.190, respectively. Hence, the overall integration is substantially lower in flies than in yeast for  
269 both mutational and evolutionary matrices.

270 In addition to the overall level of trait correlation, we also asked whether the correlational  
271 structure of traits exhibit different levels of modularity among divergent lineages when compared

272 with that among mutants. To this end, we used a covariance ratio (*CR*) test (Adams, 2016) that  
273 compares covariance within and between pre-defined modules (see Materials and Methods).  
274 Specifically, we calculated *CR* for the evolutionary covariance matrix and compared it to the *CR*  
275 distribution based on 1,000 covariance matrices generated through simulations of neutral  
276 evolution. We treated the three non-overlapping categories of the yeast traits—actin traits,  
277 nucleus traits, and cell wall traits (Ohya et al., 2005)—as three modules (**Data S1**). We found  
278 that the *CR* of the evolutionary covariance matrix exceeded that of every control dataset ( $P <$   
279  $0.001$ ; **Table 3**), suggesting natural selection for increased modularity in evolution. Consistent  
280 with this result is the observation that trait pairs with significantly strengthened *COR<sub>E</sub>* are  
281 enriched within modules ( $P = 0.036$ , randomization test), and this enrichment is particularly  
282 strong for the nucleus module ( $P < 0.001$ , randomization test). We did not analyze the fly data  
283 here because of the unknown modular structure of this relatively small set of traits that are all  
284 about the wing shape.

285

## 286 **DISCUSSION**

287 By comparing the trait-trait correlation across mutants (*COR<sub>M</sub>*) with that across divergent  
288 lineages (*COR<sub>E</sub>*) for 24,090 pairs of yeast cell morphology traits and 276 pairs of fly wing  
289 morphology traits, we detected the action of natural selection in trait-trait coevolution. The  
290 fraction of trait pairs showing evidence for selection is substantially higher in the fly (55.07%)  
291 than yeast (5.04%) data ( $P < 10^{-4}$ , chi-squared test). This is at least in part caused by a difference  
292 in statistical power, because the number of strains/species used for estimating *COR<sub>E</sub>* is much  
293 greater for the fly (110) than yeast (16) data. It is likely that a much higher fraction than 5% of  
294 the yeast trait pairs are subject to selection in their coevolution. Furthermore, as mentioned, our  
295 comparison between *COR<sub>E</sub>* and *COR<sub>M</sub>* intends to test selection on trait correlations common  
296 among the evolutionary lineages considered. If different evolutionary lineages have different  
297 trait correlations, the *COR<sub>E</sub>* estimated from all lineages may not be significantly different from  
298 *COR<sub>M</sub>* even when selection occurs in some or all of the lineages. In other words, our test is  
299 expected to underestimate the proportion of trait pairs subject to selection. In our test, a null  
300 distribution of *COR<sub>E</sub>* under neutrality was generated by simulating a Brownian motion with the  
301 observed *M* matrix used as mutational input. Although it is theoretically possible for non-neutral  
302 evolution to behave like a Brownian motion, this should not impact our test because it is

303 extremely unlikely for the non-neutral Brownian motion to follow  $M$ . Even under this unlikely  
304 scenario, a significant difference between  $COR_E$  and  $COR_M$  still signals selection while an  
305 equality between  $COR_E$  and  $COR_M$  may not prove neutrality. In other words, the potential non-  
306 neutral Brownian motion at most renders our test more conservative.

307 We demonstrated by population genetic simulation that various selection regimes can  
308 explain differences between  $COR_M$  and  $COR_E$ . In particular, strengthened or reversed  $COR_E$   
309 relative to  $COR_M$  can occur when a specific allometric relationship is preferred, while weakened  
310  $COR_E$  can occur under directional or stabilizing selection of individual traits. A notable  
311 difference between the simulation results and empirical observations is that the simulations tend  
312 to end up with extreme values of  $|COR_E|$  (i.e., close to either 1 or 0) except in the case of  
313 neutrality, whereas the empirically observed  $|COR_E|$  is usually less extreme even when  $COR_M$   
314 and  $COR_E$  are significantly different. This is due to the fact that the simulation results usually  
315 represent steady-state correlations across lineages. That is, the mean phenotype of each lineage  
316 is at or near the corresponding optimum (if any); consequently,  $|COR_E|$  is close to 1 when the  
317 optimum is a line and close to 0 when the optimum is a single combination of two trait values.  
318 However, the population mean phenotypes may not be close to their optima in some strains  
319 because of recent changes of the optima or the sparsity of mutations toward the optima, the latter  
320 of which is well known as a potential hindrance to adaptation (Agrawal & Stinchcombe, 2009;  
321 Blows & McGuigan, 2015; Hansen & Houle, 2008; Schluter, 1996). Another possibility is the  
322 existence of a wide range of preferred allometry such that there is no strong selection for extreme  
323  $|COR_E|$ . Finally, selection may not result in the preferred allometry between two traits because  
324 of the constraints from unconsidered traits (Houle, Jones, Fortune, & Sztepanacz, 2019).

325 While selection was detected for many trait pairs, a large fraction of trait pairs, especially  
326 in the yeast data, do not show a significant difference between  $COR_E$  and  $COR_M$ . These trait  
327 pairs may be divided into two groups. In the first group,  $COR_E$  and  $COR_M$  are actually different,  
328 but the difference is not found significant due to the limited statistical power. As mentioned, we  
329 believe that a substantial fraction of yeast trait pairs fit this category due to the relatively low  
330 statistical power for detecting the difference between  $COR_E$  and  $COR_M$  in the yeast data. In the  
331 second group,  $COR_E$  truly equals  $COR_M$ , which could result from one of the following three  
332 scenarios. First, the specific trait-trait correlation does not impact fitness so evolves neutrally.  
333 Second, the two traits have an intrinsic, immutable relationship (such as the hypothetical traits of

334 body size and twice the body size), so will yield equal  $COR_E$  and  $COR_M$ ; this possibility can be  
335 tested by examining the correlation of the two traits across isogenic individuals that show non-  
336 heritable phenotypic variations (Geiler-Samerotte et al., 2020). The last and perhaps the most  
337 interesting scenario is that the trait-trait correlation impacts fitness and hence has driven the  
338 optimization of  $COR_M$  via a second-order selection (Hansen & Houle, 2008; Ho & Zhang, 2014;  
339 A. Wagner, 2005), such that the first-order selection of mutations that affect the two traits is no  
340 longer needed. However, the relative frequencies of these three scenarios are unknown.

341 In addition to pairwise trait correlations, we tested hypotheses regarding the evolution of  
342 overall phenotypic integration and modularity. In the yeast data, we observed a higher  
343 modularity across natural strains than across mutants but did not find evidence for a change of  
344 overall phenotypic integration in evolution. These results support the view of increasing  
345 modularity during evolution (Clune, Mouret, & Lipson, 2013; Goswami et al., 2014; G. P.  
346 Wagner, 1999; G. P. Wagner & Altenberg, 1996; G. P. Wagner et al., 2007) but also suggest that  
347 modularity is enhanced by both strengthening trait-trait correlations within modules and  
348 weakening trait-trait correlations across modules. As mentioned, we indeed observed an  
349 enrichment of strengthened  $COR_E$  relative to  $COR_M$  within modules. However, no enrichment of  
350 weakened  $COR_E$  between modules was detected, which may be because  $|COR_M|$  between  
351 modules is already quite small, making a further reduction in correlation relatively difficult to  
352 detect statistically. In the fly data, we found evidence that natural selection has strengthened  
353 overall morphological integration, contrasting the hypothesis of a reduced integration over time  
354 (Goswami et al., 2014). One possible explanation is that the fly traits studied here are all  
355 characters of the same organ (wing) and their evolution does not represent that of the whole  
356 phenome but only one module. Another possibility is that the yeast cell morphology traits are  
357 not comparable with the fly wing morphology traits if they belong to different levels of  
358 biological organization (Zhang, 2018). However, for unicellular organisms like yeast, cellular  
359 traits are also organismal traits, so there is no strong evidence that these two sets of traits are not  
360 comparable. We did, however, found the overall integration lower for the fly than yeast traits,  
361 but whether this observation indicates a lower integration for multicellular than unicellular  
362 organisms requires analyzing more species and traits.

363 In this study, we compared  $COR_M$  estimated from one yeast strain (BY) with  $COR_E$   
364 estimated from 16 different strains, under the assumption of a constant  $COR_M$  across different

365 strains. While it is a common practice to assume that the mutational architecture is more or less  
366 constant during evolution and to study phenotypic evolution by comparing mutational or genetic  
367 (co)variances in one species with those among different species (Ackermann & Cheverud, 2004;  
368 Houle et al., 2017; Lynch, 1990), genetic variations affecting the genetic (co)variances of  
369 phenotypic traits have been reported (Jerison et al., 2017; Jones, Burger, & Arnold, 2014;  
370 Pavlicev et al., 2008). As discussed earlier, such genetic variations may allow second-order  
371 selection of  $COR_M$ . For instance, it has been hypothesized that the optimization of mutational  
372 (co)variances driven by selection for mutational robustness and/or adaptability can lead to  
373 modularity (G. P. Wagner & Altenberg, 1996; G. P. Wagner et al., 2007), but this process  
374 presumably takes a much longer time than is relevant to the present study. Even without second-  
375 order selection,  $COR_M$  may still vary across strains merely because the pleiotropic effects of a  
376 mutation may vary with the genetic background (Pavlicev & Cheverud, 2015; Svensson et al.,  
377 2021). Regardless, in the future, it would be desirable to measure mutant phenotypes from  
378 multiple lineages to investigate whether  $COR_M$  evolves, how rapidly it evolves, and whether its  
379 evolution is largely neutral or adaptive.

380 In summary, we detected the action of natural selection in shaping trait-trait coevolution.  
381 Because the traits analyzed here, especially the yeast traits, were chosen almost exclusively due  
382 to their measurability, our results likely reflect a general picture of trait-trait coevolution.  
383 Measuring these yeast traits in additional divergent natural strains with clear phylogenetic  
384 positions could improve the statistical power and clarify whether the fraction of trait pairs whose  
385 coevolution is shaped by selection is much greater than detected here. Finally, the detection of  
386 selection for enhanced modularity of the yeast traits analyzed supports the hypothesis that  
387 modularity is beneficial (Goswami et al., 2014; G. P. Wagner & Altenberg, 1996). The detection  
388 of selection in trait-trait coevolution and selection for enhanced modularity suggests that the  
389 current pleiotropic structure of mutation is not optimal. This nonoptimality could be due to the  
390 weakness of the second-order selection on mutational structure and/or a high dependence of the  
391 optimal mutational structure on the environment, which presumably changes frequently. Future  
392 studies on how the mutational structure evolves will likely further enlighten the mechanism of  
393 trait-trait coevolution.

394

## 395 MATERIALS AND METHODS

## 396 **Phenotypic data**

397 The *S. cerevisiae* cell morphology traits were previously measured by analyzing  
398 fluorescent microscopic images. Three phenotypic datasets were compiled and analyzed in this  
399 study, including (i) 220 traits measured in 4718 gene deletion lines that each lack a nonessential  
400 gene (Ohya et al., 2005), (ii) the same 220 traits measured in 37 natural strains (Yvert et al.,  
401 2013), and (iii) 187 of the 220 traits measured in 89 mutation accumulation (MA) lines (Geiler-  
402 Samerotte et al., 2016). When comparing patterns of trait correlation between two datasets, we  
403 used traits available in both datasets.

404 Before the analyses, we first standardized all trait values by converting each trait value to  
405 the natural log of the ratio of the original trait value to a reference. The standardized value of the  
406  $i$ th trait in the  $j$ th strain is  $\tilde{X}_{i,j} = \ln \frac{X_{i,j}}{X_{i,r}}$ , where  $X_{i,j}$  is the original trait value and  $X_{i,r}$  is the trait  
407 value of the reference. For the gene deletion lines, the reference is the wild-type BY strain. For  
408 the MA lines, the reference is the progenitor strain used in MA. For natural strains, the reference  
409 is the same as the reference of the mutant strains to be compared with (i.e., wild-type BY or  
410 progenitor of the MA lines).

411 The locations of 12 vein intersections on the fly wing were previously measured in 150  
412 MA lines of *Drosophila melanogaster* and a mutational covariance matrix was estimated (Houle  
413 & Fierst, 2013). These traits were also measured in 110 Drosophilid species and an evolutionary  
414 covariance matrix was estimated with species phylogeny taken into account (Houle et al., 2017).  
415 Both matrices are based on log-scale trait values.

416

## 417 **Influence of the sampling error on the $M$ matrix**

418 To evaluate the influence of sampling error on the estimated  $M$  matrix of yeast or fly, we  
419 took samples (vectors of phenotypes) from the multivariate distribution of  $M$  (4,817 samples for  
420 yeast gene deletion data and 150 samples for fly MA data), estimated a covariance matrix ( $\tilde{M}$ )  
421 from these samples, and calculated Pearson's correlation coefficient between the eigenvalues of  
422  $M$  and  $\tilde{M}$ . This was repeated 1,000 times and the distribution of the correlation coefficient was  
423 used to evaluate the potential impact of sampling error on  $M$ .

424

## 425 **Comparison of mutational and evolutionary correlations**

426 To take into account the phylogenetic relationships among yeast strains in estimating  
427  $COR_E$ , we utilized a distance-based tree previously inferred (Peter et al., 2018) (**Fig. S1**). Strains  
428 with mosaic origins inferred in the same study (Peter et al., 2018) were removed before analysis,  
429 resulting in 16 remaining natural strains. Because the BY strain was not included in the data file  
430 in that study (Peter et al., 2018), W303, a laboratory strain closely related to BY, was chosen to  
431 represent BY. We obtained the evolutionary covariance matrix using the *ratematrix* function  
432 from the R package *geiger* (Pennell et al., 2014; Revell, Harmon, Langerhans, & Kolbe, 2007),  
433 which calculates evolutionary covariances using the independent contrast method (Felsenstein,  
434 1985). The evolutionary covariance matrix was then converted to the corresponding correlation  
435 matrix.

436 To test whether there exists a significant modular structure among traits, we performed  
437 the covariance ratio ( $CR$ ) test. For each pair of predefined modules, traits were first re-ordered  
438 such that traits belonging to each module were located in the upper-left and lower-right corners  
439 of the covariance matrix, respectively, and  $CR = \sqrt{\frac{\text{trace}(M_{12}M_{21})}{\sqrt{\text{trace}(M_{11}^*M_{11}^*) + \text{trace}(M_{22}^*M_{22}^*)}}}$ , where  $M_{12}$  and  
440  $M_{21}$  are the upper-right and lower-left sections of the original covariance matrix, respectively,  
441 containing all between-module covariances,  $M_{11}^*$  is the upper-left section with diagonal elements  
442 replaced by zeros,  $M_{22}^*$  is the lower-right section with diagonal elements replaced by zeros, and  
443  $\text{trace}(M)$  denotes the trace, or the sum of diagonal elements, of matrix  $M$  (Adams, 2016).  
444 Because three modules were defined in the yeast data, the average of all pairwise  $CR$  values was  
445 used to represent the overall modularity.

446 To test whether the observed pairwise trait correlations, overall phenotypic integration, or  
447 modularity at the level of evolutionary divergence are significantly different from those expected  
448 by mutation alone, we simulated neutral evolution along the phylogenetic tree that had been used  
449 in estimating  $COR_E$ . A Brownian motion model was used to simulate phenotypic evolution such  
450 that the amount of evolution in branch  $i$  is  $M_i l$ , where  $M_i$  is a vector sampled from the  
451 multivariate normal distribution of the mutational covariance matrix  $M$  and  $l$  is the branch  
452 length. Sampling was performed using the *rmvnorm* function in the R package *mvtnorm* (Genz,  
453 2020). The starting value of each trait is 0 in all simulations. The phenotypic value of each  
454 strain was obtained by adding up the amount of evolution on all branches ancestral to the strain.  
455 This was repeated 1,000 times to obtain an empirical null distribution of  $COR_E$ . The null

456 distributions of  $V_{\text{eigen}}$  and  $CR$  were similarly obtained. In each two-tailed test, the  $P$ -value was  
457 calculated by  $P = \frac{2 \min(n_H, n_L)}{1000}$ , where  $n_H$  is the number of simulated values of the test statistic  
458 that are higher than the observed value,  $n_L$  is the number of those that are lower than the  
459 observed value, and  $\min(n_H, n_L)$  is the smaller of  $n_H$  and  $n_L$ . The  $P$ -values for pairwise trait  
460 correlations were converted to adjusted  $P$ -values following the Benjamini-Hochberg procedure  
461 (Benjamini & Hochberg, 1995) and an adjusted  $P$ -value below 0.05 indicates selection.

462

### 463 **Computer simulation of trait-trait coevolution under selection**

464 In each simulation, we considered a pair of traits with equal amounts of mutational  
465 variance  $V_M$ , which is set to be 0.01. The mutational covariance matrix is thus  $M =$   
466  $\begin{bmatrix} V_M & COV_M \\ COV_M & V_M \end{bmatrix} = \begin{bmatrix} V_M & V_M COR_M \\ V_M COR_M & V_M \end{bmatrix}$ , where  $COV_M$  is the mutational covariance. The  
467 number of mutations is a random Poisson variable with the mean equal to 1. The phenotypic  
468 effect of a mutation is drawn from the multivariate normal distribution of  $M$  using the *rmvnorm*  
469 function in the R package *mvtnorm* (Genz, 2020). The starting phenotype is (0, 0) in all  
470 simulations.

471 We considered a Gaussian fitness function  $f = \exp(-\frac{D^2}{2})$ , where  $f$  is the fitness and  $D$  is  
472 the distance between the current phenotype and the optimal phenotype. When there is a single  
473 fitness peak (i.e., the fitness optimum is a single point),  $D$  is the Euclidean distance defined by

474  $\sqrt{d_1^2 + d_2^2}$ , where  $d_1$  and  $d_2$  are the distances between the current phenotypic values of the two  
475 traits and their corresponding optima, respectively. When there is a fitness ridge (i.e., the fitness  
476 optimum is a line),  $D$  is the shortest distance from the current phenotype to the fitness ridge. The  
477 selection coefficient  $s$  equals  $\frac{f}{f_a} - 1$ , where  $f$  and  $f_a$  are the fitness values of the mutant and wild-

478 type, respectively. The fixation probability of a newly arisen mutant is  $P_f = \frac{1 - \exp(-2s)}{1 - \exp(-2N_e s)}$  in a  
479 haploid population (Kimura, 1962), where the effective population size  $N_e$  was set at  $10^4$ . After  
480 each unit time, the phenotypic effect of each mutation is added to the population mean at a  
481 probability of  $N_e P_f$ ; this probability is treated as 1 when  $N_e P_f > 1$  or when there is no selection.

482 Combinations of parameters used in the simulations are listed in Table 2.



483 In simulations where different lineages are assigned different optima, each lineage's  
484 optimum was obtained by independently drawing the optimal values of the two traits from the  
485 standard normal distribution. Before conducting simulations, we confirmed that the optima of  
486 the two traits are not correlated (correlation coefficient = 0.0882,  $P = 0.5423$ ,  $t$ -test).

487 All analyses in this study were conducted in R (R Core Development Team, 2010).

488

## 489 ACKNOWLEDGEMENTS

490 We thank members of the Zhang lab for valuable comments. This work was supported  
491 by U.S. National Institutes of Health grant R35GM139484 to J.Z.

492

## 493 REFERENCES

- 494 Ackermann, R. R., & Cheverud, J. M. (2004). Detecting genetic drift versus selection in human  
495 evolution. *Proc Natl Acad Sci U S A*, *101*(52), 17946-17951.  
496 doi:10.1073/pnas.0405919102
- 497 Adams, D. C. (2016). Evaluating modularity in morphometric data: challenges with the RV  
498 coefficient and a new test measure. *Methods in Ecology and Evolution*, *7*(5), 565-572.  
499 doi:10.1111/2041-210x.12511
- 500 Agrawal, A. F., & Stinchcombe, J. R. (2009). How much do genetic covariances alter the rate of  
501 adaptation? *Proceedings of the Royal Society B-Biological Sciences*, *276*(1659), 1183-  
502 1191. doi:10.1098/rspb.2008.1671
- 503 Arnold, S. J., Burger, R., Hohenlohe, P. A., Ajie, B. C., & Jones, A. G. (2008). Understanding  
504 the Evolution and Stability of the G-Matrix. *Evolution*, *62*(10), 2451-2461.  
505 doi:10.1111/j.1558-5646.2008.00472.x
- 506 Benjamini, Y., & Hochberg, Y. (1995). Controlling the False Discovery Rate - a Practical and  
507 Powerful Approach to Multiple Testing. *Journal of the Royal Statistical Society Series B-*  
508 *Statistical Methodology*, *57*(1), 289-300. doi:DOI 10.1111/j.2517-6161.1995.tb02031.x
- 509 Blows, M. W., & Mcguigan, K. (2015). The distribution of genetic variance across phenotypic  
510 space and the response to selection. *Molecular Ecology*, *24*(9), 2056-2072.  
511 doi:10.1111/mec.13023
- 512 Bolstad, G. H., Cassara, J. A., Marquez, E., Hansen, T. F., van der Linde, K., Houle, D., &  
513 Pelabon, C. (2015). Complex constraints on allometry revealed by artificial selection on  
514 the wing of *Drosophila melanogaster*. *Proceedings of the National Academy of Sciences*  
515 *of the United States of America*, *112*(43), 13284-13289. doi:10.1073/pnas.1505357112
- 516 Brown, J. H., Gillooly, J. F., Allen, A. P., Savage, V. M., & West, G. B. (2004). Toward a  
517 metabolic theory of ecology. *Ecology*, *85*(7), 1771-1789. doi:Doi 10.1890/03-9000
- 518 Clune, J., Mouret, J. B., & Lipson, H. (2013). The evolutionary origins of modularity. *Proc Biol*  
519 *Sci*, *280*(1755), 20122863. doi:10.1098/rspb.2012.2863
- 520 Dochtermann, N. A., & Dingemans, N. J. (2013). Behavioral syndromes as evolutionary  
521 constraints. *Behavioral Ecology*, *24*(4), 806-811. doi:10.1093/beheco/art002

- 522 Fabre, A. C., Bardua, C., Bon, M., Clavel, J., Felice, R. N., Streicher, J. W., . . . Goswami, A.  
523 (2020). Metamorphosis shapes cranial diversity and rate of evolution in salamanders. *Nat*  
524 *Ecol Evol*, 4(8), 1129-1140. doi:10.1038/s41559-020-1225-3
- 525 Felsenstein, J. (1985). Phylogenies and the Comparative Method. *American Naturalist*, 125(1),  
526 1-15. doi:Doi 10.1086/284325
- 527 Gardner, K. M., & Latta, R. G. (2007). Shared quantitative trait loci underlying the genetic  
528 correlation between continuous traits. *Molecular Ecology*, 16(20), 4195-4209.  
529 doi:10.1111/j.1365-294X.2007.03499.x
- 530 Geiler-Samerotte, K. A., Li, S., Lazaris, C., Taylor, A., Ziv, N., Ramjeawan, C., . . . Siegal, M.  
531 L. (2020). Extent and context dependence of pleiotropy revealed by high-throughput  
532 single-cell phenotyping. *Plos Biology*, 18(8). doi:ARTN e3000836  
533 10.1371/journal.pbio.3000836
- 534 Geiler-Samerotte, K. A., Zhu, Y. O., Goulet, B. E., Hall, D. W., & Siegal, M. L. (2016).  
535 Selection Transforms the Landscape of Genetic Variation Interacting with Hsp90. *Plos*  
536 *Biology*, 14(10). doi:ARTN e2000465 10.1371/journal.pbio.2000465
- 537 Genz, A. B., F.; Miwa, T.; Mi, X.; Leisch, F.; Scheipl, F.; Hothorn, T. (2020). mvtnorm:  
538 Multivariate Normal and t Distributions. R package version 1.1-0, [https://CRAN.R-](https://CRAN.R-project.org/package=mvtnorm)  
539 [project.org/package=mvtnorm](https://CRAN.R-project.org/package=mvtnorm).
- 540 Glazier, D. S. (2010). A unifying explanation for diverse metabolic scaling in animals and plants.  
541 *Biological Reviews*, 85(1), 111-138. doi:10.1111/j.1469-185X.2009.00095.x
- 542 Goswami, A., Smaers, J. B., Soligo, C., & Polly, P. D. (2014). The macroevolutionary  
543 consequences of phenotypic integration: from development to deep time. *Philos Trans R*  
544 *Soc Lond B Biol Sci*, 369(1649), 20130254. doi:10.1098/rstb.2013.0254
- 545 Gould, S. J. (1966). Allometry and Size in Ontogeny and Phylogeny. *Biological Reviews*, 41(4),  
546 587-640. doi:DOI 10.1111/j.1469-185X.1966.tb01624.x
- 547 Hansen, T. F., & Houle, D. (2008). Measuring and comparing evolvability and constraint in  
548 multivariate characters. *Journal of Evolutionary Biology*, 21(5), 1201-1219.  
549 doi:10.1111/j.1420-9101.2008.01573.x
- 550 Ho, W. C., Ohya, Y., & Zhang, J. Z. (2017). Testing the neutral hypothesis of phenotypic  
551 evolution. *Proceedings of the National Academy of Sciences of the United States of*  
552 *America*, 114(46), 12219-12224. doi:10.1073/pnas.1710351114
- 553 Ho, W. C., & Zhang, J. (2014). The genotype-phenotype map of yeast complex traits: basic  
554 parameters and the role of natural selection. *Mol Biol Evol*, 31(6), 1568-1580. doi:Doi  
555 10.1093/Molbev/Msu131
- 556 Hohenlohe, P. A., & Arnold, S. J. (2008). MIPoD: a hypothesis-testing framework for  
557 microevolutionary inference from patterns of divergence. *American Naturalist*, 171(3),  
558 366-385. doi:10.1086/527498
- 559 Houle, D., Bolstad, G. H., van der Linde, K., & Hansen, T. F. (2017). Mutation predicts 40  
560 million years of fly wing evolution. *Nature*, 548(7668), 447-450.  
561 doi:10.1038/nature23473
- 562 Houle, D., & Fierst, J. (2013). Properties of Spontaneous Mutational Variance and Covariance  
563 for Wing Size and Shape in *Drosophila Melanogaster*. *Evolution*, 67(4), 1116-1130.  
564 doi:10.1111/j.1558-5646.2012.01838.x
- 565 Houle, D., Jones, L. T., Fortune, R., & Sztepanacz, J. L. (2019). Why does allometry evolve so  
566 slowly? *Integrative and Comparative Biology*, 59(5), 1429-1440. doi:10.1093/icb/icz099
- 567 Huxley, J. (1972). Problems of relative growth. 2d.

- 568 Jerison, E. R., Kryazhimskiy, S., Mitchell, J. K., Bloom, J. S., Kruglyak, L., & Desai, M. M.  
569 (2017). Genetic variation in adaptability and pleiotropy in budding yeast. *Elife*, 6.  
570 doi:10.7554/eLife.27167
- 571 Jones, A. G., Burger, R., & Arnold, S. J. (2014). Epistasis and natural selection shape the  
572 mutational architecture of complex traits. *Nature Communications*, 5, 3709.  
573 doi:10.1038/ncomms4709
- 574 Kimura, M. (1962). On the probability of fixation of mutant genes in a population. *Genetics*, 47,  
575 713-719.
- 576 Kingsolver, J. G., Hoekstra, H. E., Hoekstra, J. M., Berrigan, D., Vignieri, S. N., Hill, C. E., . . .  
577 Beerli, P. (2001). The strength of phenotypic selection in natural populations. *Am Nat*,  
578 157(3), 245-261. doi:10.1086/319193
- 579 Lande, R. (1979). Quantitative Genetic Analysis of Multivariate Evolution, Applied to Brain -  
580 Body Size Allometry. *Evolution*, 33(1), 402-416. doi:DOI 10.1111/j.1558-  
581 5646.1979.tb04694.x
- 582 Lande, R. (1980). The Genetic Covariance between Characters Maintained by Pleiotropic  
583 Mutations. *Genetics*, 94(1), 203-215.
- 584 Lande, R. (2007). The maintenance of genetic variability by mutation in a polygenic character  
585 with linked loci (Reprinted). *Genetics Research*, 89(5-6), 373-387.  
586 doi:10.1017/S0016672308009555
- 587 Liti, G., Carter, D. M., Moses, A. M., Warringer, J., Parts, L., James, S. A., . . . Louis, E. J.  
588 (2009). Population genomics of domestic and wild yeasts. *Nature*, 458(7236), 337-341.
- 589 Lynch, M. (1990). The Rate of Morphological Evolution in Mammals from the Standpoint of the  
590 Neutral Expectation. *American Naturalist*, 136(6), 727-741. doi:Doi 10.1086/285128
- 591 Lynch, M., & Hill, W. G. (1986). Phenotypic evolution by neutral mutation. *Evolution*, 40(5),  
592 915-935. doi:Doi 10.2307/2408753
- 593 Martin, R. D. (1981). Relative Brain Size and Basal Metabolic-Rate in Terrestrial Vertebrates.  
594 *Nature*, 293(5827), 57-60. doi:DOI 10.1038/293057a0
- 595 Mendes, F. K., Fuentes-Gonzalez, J. A., Schraiber, J. G., & Hahn, M. W. (2018). A multispecies  
596 coalescent model for quantitative traits. *Elife*, 7. doi:10.7554/eLife.36482
- 597 Navalon, G., Marugan-Lobon, J., Bright, J. A., Cooney, C. R., & Rayfield, E. J. (2020). The  
598 consequences of craniofacial integration for the adaptive radiations of Darwin's finches  
599 and Hawaiian honeycreepers. *Nat Ecol Evol*, 4(2), 270-278. doi:10.1038/s41559-019-  
600 1092-y
- 601 Ohya, Y., Sese, J., Yukawa, M., Sano, F., Nakatani, Y., Saito, T. L., . . . Morishita, S. (2005).  
602 High-dimensional and large-scale phenotyping of yeast mutants. *Proceedings of the*  
603 *National Academy of Sciences of the United States of America*, 102(52), 19015-19020.  
604 doi:10.1073/pnas.0509436102
- 605 Olson, E. C., & Miller, R. L. (1999). *Morphological integration* (Pbk. ed.). Chicago: University  
606 of Chicago Press.
- 607 Pavlicev, M., & Cheverud, J. M. (2015). Constraints Evolve: Context Dependency of Gene  
608 Effects Allows Evolution of Pleiotropy. *Annual Review of Ecology, Evolution, and*  
609 *Systematics*, Vol 46, 46, 413-434. doi:10.1146/annurev-ecolsys-120213-091721
- 610 Pavlicev, M., Cheverud, J. M., & Wagner, G. P. (2009). Measuring Morphological Integration  
611 Using Eigenvalue Variance. *Evolutionary Biology*, 36(1), 157-170. doi:10.1007/s11692-  
612 008-9042-7

- 613 Pavlicev, M., Kenney-Hunt, J. P., Norgard, E. A., Roseman, C. C., Wolf, J. B., & Cheverud, J.  
614 M. (2008). Genetic variation in pleiotropy: Differential epistasis as a source of variation  
615 in the allometric relationship between long bone lengths and body weight. *Evolution*,  
616 62(1), 199-213. doi:10.1111/j.1558-5646.2007.00255.x
- 617 Pennell, M. W., Eastman, J. M., Slater, G. J., Brown, J. W., Uyeda, J. C., FitzJohn, R. G., . . .  
618 Harmon, L. J. (2014). geiger v2.0: an expanded suite of methods for fitting  
619 macroevolutionary models to phylogenetic trees. *Bioinformatics*, 30(15), 2216-2218.  
620 doi:10.1093/bioinformatics/btu181
- 621 Peter, J., De Chiara, M., Friedrich, A., Yue, J. X., Pflieger, D., Bergstrom, A., . . . Schacherer, J.  
622 (2018). Genome evolution across 1,011 *Saccharomyces cerevisiae* isolates. *Nature*,  
623 556(7701), 339-344. doi:10.1038/s41586-018-0030-5
- 624 Pettersen, A. K., White, C. R., & Marshall, D. J. (2016). Metabolic rate covaries with fitness and  
625 the pace of the life history in the field. *Proceedings of the Royal Society B-Biological*  
626 *Sciences*, 283(1831). doi:ARTN 20160323 10.1098/rspb.2016.0323
- 627 Pigliucci, M. (2003). Phenotypic integration: studying the ecology and evolution of complex  
628 phenotypes. *Ecology Letters*, 6(3), 265-272. doi:DOI 10.1046/j.1461-0248.2003.00428.x
- 629 Porto, A., Sebastiao, H., Pavan, S. E., VandeBerg, J. L., Marroig, G., & Cheverud, J. M. (2015).  
630 Rate of evolutionary change in cranial morphology of the marsupial genus *Monodelphis*  
631 is constrained by the availability of additive genetic variation. *J Evol Biol*, 28(4), 973-  
632 985. doi:10.1111/jeb.12628
- 633 R Core Development Team. (2010). R: A language and environment for statistical computing.
- 634 Revell, L. J., Harmon, L. J., Langerhans, R. B., & Kolbe, J. J. (2007). A phylogenetic approach  
635 to determining the importance of constraint on phenotypic evolution in the neotropical  
636 lizard *Anolis cristatellus*. *Evolutionary Ecology Research*, 9(2), 261-282.
- 637 Roff, D. A., Mostow, S., & Fairbairn, D. J. (2002). The evolution of trade-offs: Testing  
638 predictions on response to selection and environmental variation. *Evolution*, 56(1), 84-95.
- 639 Saltz, J. B., Hessel, F. C., & Kelly, M. W. (2017). Trait Correlations in the Genomics Era.  
640 *Trends in Ecology & Evolution*, 32(4), 279-290. doi:10.1016/j.tree.2016.12.008
- 641 Schluter, D. (1996). Adaptive radiation along genetic lines of least resistance. *Evolution*, 50(5),  
642 1766-1774. doi:DOI 10.1111/j.1558-5646.1996.tb03563.x
- 643 Shoval, O., Sheftel, H., Shinar, G., Hart, Y., Ramote, O., Mayo, A., . . . Alon, U. (2012).  
644 Evolutionary trade-offs, Pareto optimality, and the geometry of phenotype space. *Science*,  
645 336(6085), 1157-1160. doi:10.1126/science.1217405
- 646 Sih, A., Bell, A., & Johnson, J. C. (2004). Behavioral syndromes: an ecological and evolutionary  
647 overview. *Trends in Ecology & Evolution*, 19(7), 372-378.  
648 doi:10.1016/j.tree.2004.04.009
- 649 Simon, M. N., Machado, F. A., & Marroig, G. (2016). High evolutionary constraints limited  
650 adaptive responses to past climate changes in toad skulls. *Proc Biol Sci*, 283(1841).  
651 doi:10.1098/rspb.2016.1783
- 652 Sinervo, B., & Svensson, E. (2002). Correlational selection and the evolution of genomic  
653 architecture. *Heredity (Edinb)*, 89(5), 329-338. doi:10.1038/sj.hdy.6800148
- 654 Stepan, S. J., Phillips, P. C., & Houle, D. (2002). Comparative quantitative genetics: evolution  
655 of the G matrix. *Trends in Ecology & Evolution*, 17(7), 320-327. doi:Pii S0169-  
656 5347(02)02505-3 Doi 10.1016/S0169-5347(02)02505-3

- 657 Svensson, E. I., Arnold, S. J., Burger, R., Csillery, K., Draghi, J., Henshaw, J. M., . . . Runemark,  
658 A. (2021). Correlational selection in the age of genomics. *Nat Ecol Evol*.  
659 doi:10.1038/s41559-021-01413-3
- 660 Wagner, A. (2005). *Robustness and evolvability in living systems*. Princeton, NJ: Princeton  
661 University Press.
- 662 Wagner, G. P. (1989). Multivariate mutation-selection balance with constrained pleiotropic  
663 effects. *Genetics*, *122*(1), 223-234.
- 664 Wagner, G. P. (1999). A research programme for testing the biological homology concept.  
665 *Novartis Found Symp*, *222*, 125-134; discussion 134-140.
- 666 Wagner, G. P., & Altenberg, L. (1996). Perspective: Complex Adaptations and the Evolution of  
667 Evolvability. *Evolution*, *50*(3), 967-976. doi:10.1111/j.1558-5646.1996.tb02339.x
- 668 Wagner, G. P., Pavlicev, M., & Cheverud, J. M. (2007). The road to modularity. *Nature Reviews*  
669 *Genetics*, *8*(12), 921-931. doi:10.1038/nrg2267
- 670 Wagner, G. P., & Zhang, J. Z. (2011). The pleiotropic structure of the genotype-phenotype map:  
671 the evolvability of complex organisms. *Nature Reviews Genetics*, *12*(3), 204-213.  
672 doi:10.1038/nrg2949
- 673 Walsh, B., & Blows, M. W. (2009). Abundant Genetic Variation plus Strong Selection =  
674 Multivariate Genetic Constraints: A Geometric View of Adaptation. *Annual Review of*  
675 *Ecology Evolution and Systematics*, *40*, 41-59.  
676 doi:10.1146/annurev.ecolsys.110308.120232
- 677 Walter, G. M., Aguirre, J. D., Blows, M. W., & Ortiz-Barrientos, D. (2018). Evolution of  
678 Genetic Variance during Adaptive Radiation. *American Naturalist*, *191*(4), E108-E128.  
679 doi:10.1086/696123
- 680 Wang, Z., Liao, B. Y., & Zhang, J. (2010). Genomic patterns of pleiotropy and the evolution of  
681 complexity. *Proc Natl Acad Sci U S A*, *107*(42), 18034-18039.  
682 doi:10.1073/pnas.1004666107
- 683 Watanabe, A., Fabre, A. C., Felice, R. N., Maisano, J. A., Muller, J., Herrel, A., & Goswami, A.  
684 (2019). Ecomorphological diversification in squamates from conserved pattern of cranial  
685 integration. *Proc Natl Acad Sci U S A*, *116*(29), 14688-14697.  
686 doi:10.1073/pnas.1820967116
- 687 White, C. R., Marshall, D. J., Alton, L. A., Arnold, P. A., Beaman, J. E., Bywater, C. L., . . .  
688 Ortiz-Barrientos, D. (2019). The origin and maintenance of metabolic allometry in  
689 animals. *Nat Ecol Evol*, *3*(4), 598-603. doi:10.1038/s41559-019-0839-9
- 690 Yvert, G., Ohnuki, S., Nogami, S., Imanaga, Y., Fehrmann, S., Schacherer, J., & Ohya, Y.  
691 (2013). Single-cell phenomics reveals intra-species variation of phenotypic noise in yeast.  
692 *BMC Syst Biol*, *7*, 54. doi:10.1186/1752-0509-7-54
- 693 Zhang, J. Z. (2018). Neutral Theory and Phenotypic Evolution. *Molecular Biology and*  
694 *Evolution*, *35*(6), 1327-1331. doi:10.1093/molbev/msy065  
695  
696  
697

698 Table 1. Number of trait pairs with significantly different  $COR_E$  and  $COR_M$ .

|              | Yeast                                                    |                                               | Fly<br>(276 trait pairs) |
|--------------|----------------------------------------------------------|-----------------------------------------------|--------------------------|
|              | $COR_M$ from gene deletion<br>lines (24,090 trait pairs) | $COR_M$ from MA lines<br>(17,391 trait pairs) |                          |
| Strengthened | 393                                                      | 578                                           | 57                       |
| Weakened     | 145                                                      | 281                                           | 59                       |
| Reversed     | 677                                                      | 859                                           | 36                       |
| Total        | 1215                                                     | 1718                                          | 152                      |

699  
700  
701

702 Table 2. Parameters and results of simulations of trait-trait coevolution.

| Optimum                                          | $COR_M$ | Median $COR_E$ at the end of simulation | Fraction of simulations with $COR_E > COR_M$ | $COR_E$ compared with $COR_M$ |
|--------------------------------------------------|---------|-----------------------------------------|----------------------------------------------|-------------------------------|
| No optimum                                       | 0.9     | 0.900                                   | 49.5%                                        | No difference                 |
|                                                  | 0.5     | 0.495                                   | 47.5%                                        | No difference                 |
|                                                  | 0.1     | 0.113                                   | 55.5%                                        | No difference                 |
| $y = x^*$                                        | 0.9     | 1.000                                   | 100%                                         | Strengthened                  |
|                                                  | 0.5     | 1.000                                   | 100%                                         | Strengthened                  |
|                                                  | 0.1     | 1.000                                   | 100%                                         | Strengthened                  |
| $y = 0.5x$                                       | 0.9     | 1.000                                   | 100%                                         | Strengthened                  |
|                                                  | 0.5     | 1.000                                   | 100%                                         | Strengthened                  |
|                                                  | 0.1     | 1.000                                   | 100%                                         | Strengthened                  |
| $y = -0.5x$                                      | 0.9     | -0.995                                  | 0%                                           | Reversed                      |
|                                                  | 0.5     | -0.999                                  | 0%                                           | Reversed                      |
|                                                  | 0.1     | -1.000                                  | 0%                                           | Reversed                      |
| $y = -x$                                         | 0.9     | -0.997                                  | 0%                                           | Reversed                      |
|                                                  | 0.5     | -0.999                                  | 0%                                           | Reversed                      |
|                                                  | 0.1     | -1.000                                  | 0%                                           | Reversed                      |
| (0, 0)                                           | 0.9     | 0.0213                                  | 0%                                           | Weakened                      |
|                                                  | 0.5     | 0.00142                                 | 0.5%                                         | Weakened                      |
|                                                  | 0.1     | -0.0109                                 | 24%                                          | No difference                 |
| Drawn from $\mathcal{N}(\mathbf{0}, \mathbf{1})$ | 0.9     | 0.0895                                  | 0%                                           | Weakened                      |
|                                                  | 0.5     | 0.0874                                  | 0%                                           | Weakened                      |
|                                                  | 0.1     | 0.0866                                  | 6%                                           | No difference                 |

\* $x$  and  $y$  respectively represent the values of the two traits considered.

703  
704  
705  
706

707 Table 3. Overall phenotypic integration ( $V_{\text{eigen}}$ ) and modularity ( $CR$ ) at the levels of mutation  
708 and evolutionary divergence. Values at the level of mutation are medians from 1,000 control  
709 sets.

| Statistic          | Taxon | Mutation | Divergence | $P$ -value |
|--------------------|-------|----------|------------|------------|
| $V_{\text{eigen}}$ | Yeast | 44.814   | 58.656     | 0.186      |
|                    | Fly   | 3.530    | 4.359      | 0.02       |
| $CR$               | Yeast | 0.759    | 0.997      | < 0.001    |

710  
711  
712



713 A

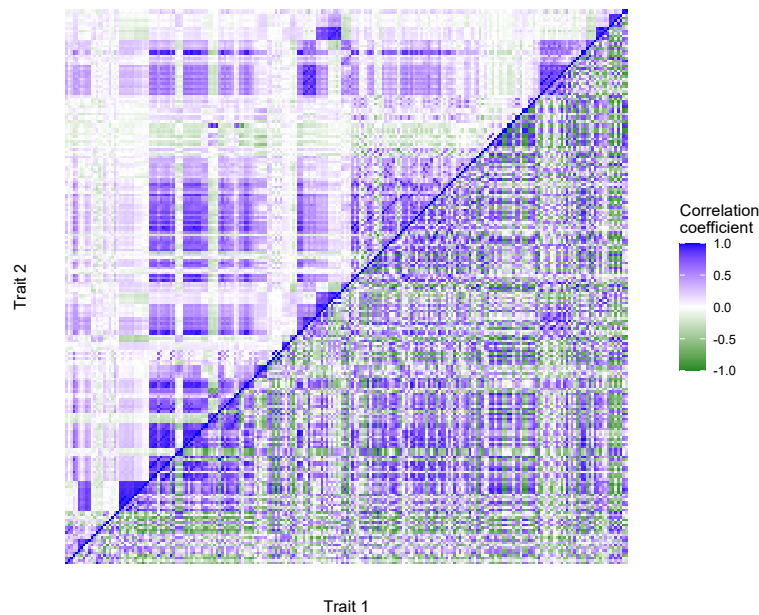

714  
715  
716

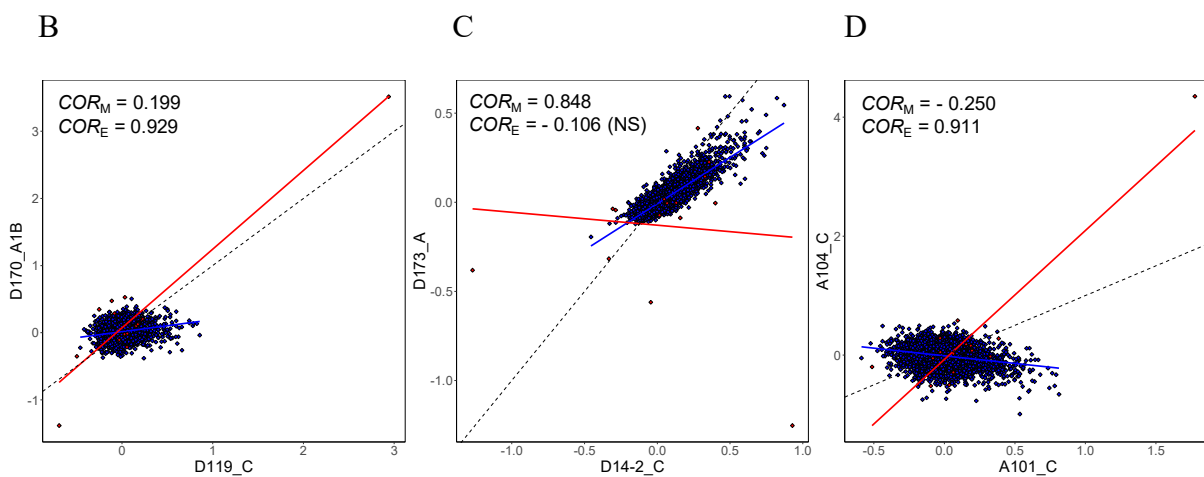

717  
718  
719  
720  
721  
722  
723  
724  
725  
726  
727  
728  
729  
730

**Figure 1.** Detecting selection in yeast cell morphology trait-trait coevolution. (A) Mutational ( $COR_M$ , upper triangle) and evolutionary ( $COR_E$ , lower triangle) correlation matrices for the 220 yeast traits, which are ordered according to their IDs. (B) An example of evolutionarily strengthened correlation. (C) An example of evolutionarily weakened correlation. (D) An example of evolutionarily reversed correlation. In (B)-(D), each blue dot represents a gene deletion line (a.k.a. mutant) while each red dot represents an independent contrast derived from natural strains. Blue and red lines are linear regressions between the standardized values of the two traits in mutants and independent contrasts, respectively, while the dotted blackline shows the diagonal ( $y = x$ ). Trait IDs are shown along the axes. All  $COR_M$  and  $COR_E$  values shown are significantly different from 0 except when indicated by “NS” in the parentheses.

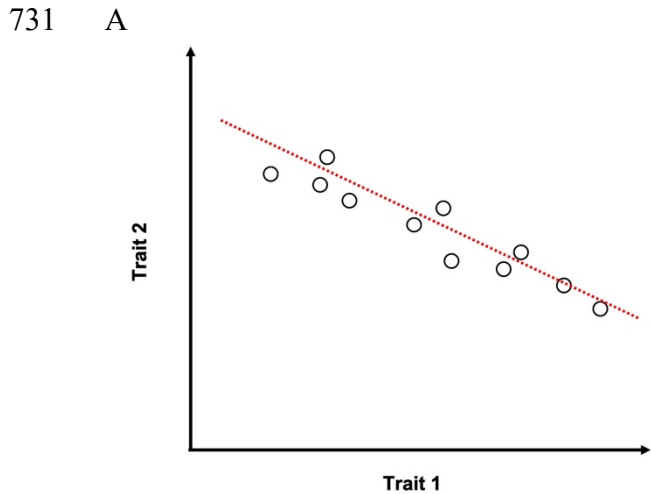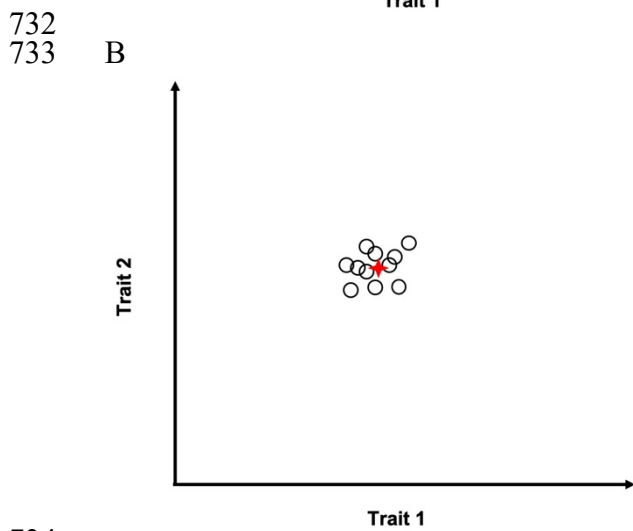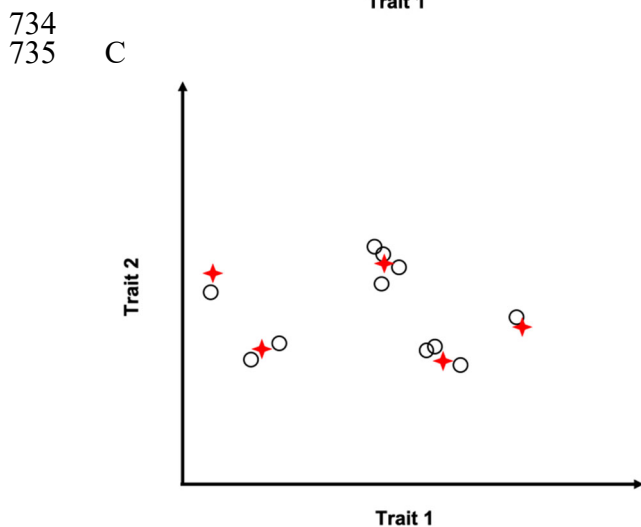

736  
737 **Figure 2.** Schematic illustration of predictions made by models of trait-trait coevolution. Each  
738 circle represents the equilibrium mean phenotype of two hypothetical traits (trait 1 and trait 2) of  
739 a diverging lineage. (A) When a specific allometric relationship is selectively favored, the  
740 population mean phenotypes are distributed along the fitness ridge (i.e., the optimal allometric

741 line shown in red), resulting in a strong trait correlation across lineages. (B) When a specific  
742 value is selectively favored for each trait, the population mean phenotypes are concentrated near  
743 the optimal phenotype (marked by the red cross) and the trait correlation across lineages is weak.  
744 (C) When different lineages have different optimal phenotypes (marked by red crosses) that are  
745 randomly distributed, the trait correlation across lineages is weak.

## **Supplementary materials for “Detecting natural selection in trait-trait coevolution”**

D. Jiang & J. Zhang

The supplementary materials include:

Table S1

Figures S1-S3

Data S1 (in a separate Excel file)

Table S1. Pearson's correlation between eigenvalues of  $M$  and those of the covariance matrix estimated from samples from  $M(\tilde{M})$ . Results from 1000 replicates are shown.

| Taxon | Sample size | Minimum correlation coefficient | Median correlation coefficient |
|-------|-------------|---------------------------------|--------------------------------|
| Yeast | 4,817       | 0.9993745                       | 0.9999503                      |
| Fly   | 150         | 0.9698937                       | 0.9967839                      |

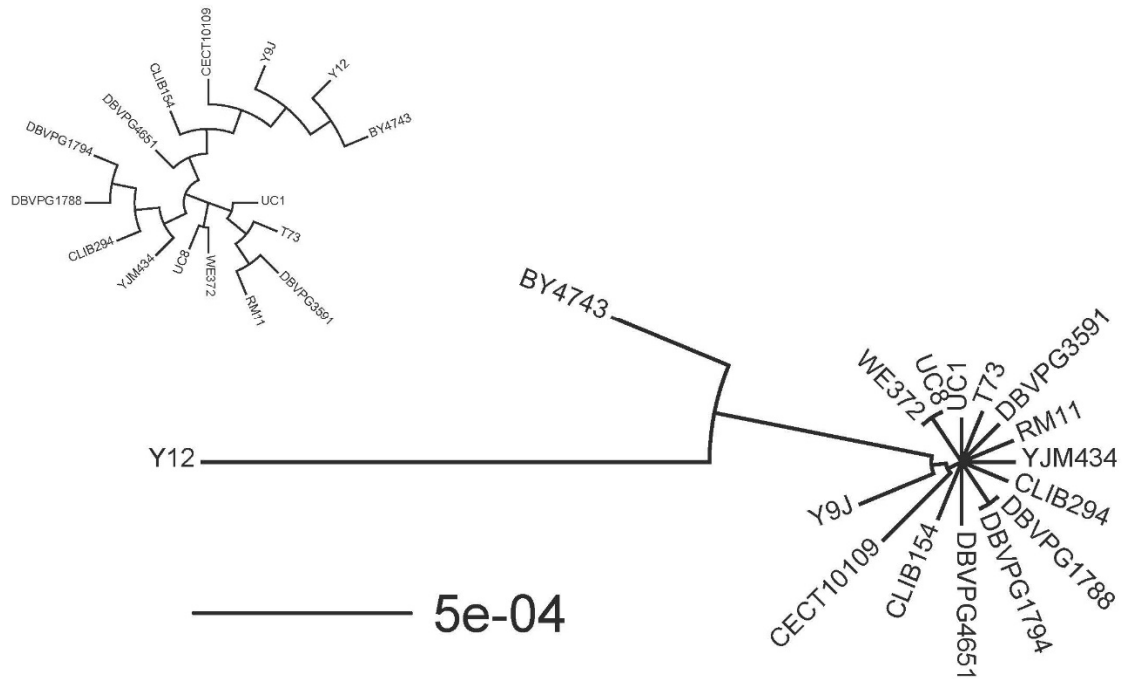

**Fig. S1.** Neighbor-joining tree of the 16 natural yeast strains used in this study, based on 1,544,489 biallelic single nucleotide polymorphism (SNP) sites. Scale bar indicates genomic divergence level. The tree was based on the distance matrix downloaded from <http://1002genomes.u-strasbg.fr/files/1011DistanceMatrixBasedOnSNPs.tab.gz>. The inset at the top left corner shows the tree topology but the branch lengths are not drawn to scale.

A

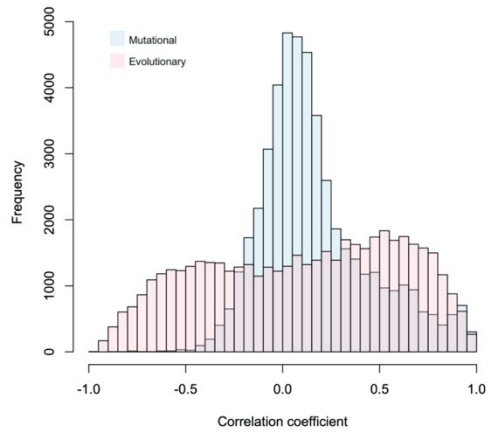

B

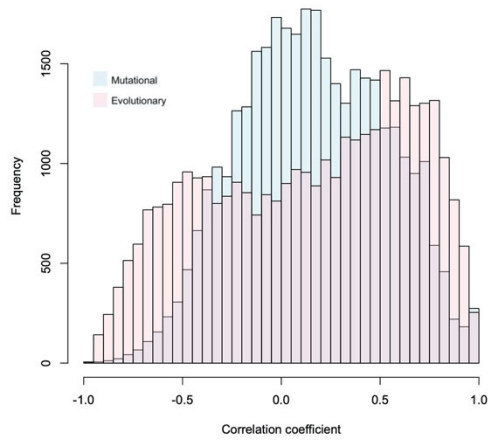

C

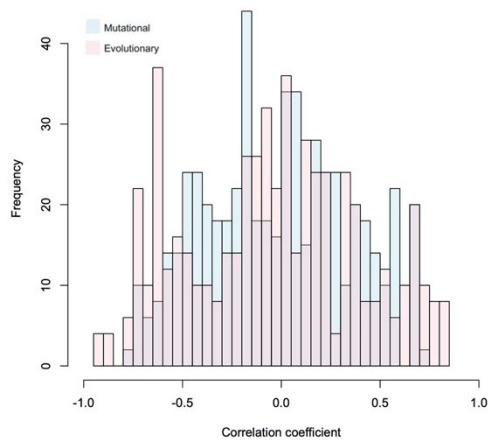

**Fig. S2.** Frequency distributions of mutational ( $COR_M$ ) and evolutionary ( $COR_E$ ) correlations across all examined trait pairs. (A) Distributions for yeast when  $COR_M$  is based on gene deletion

lines. (B) Distributions for yeast when  $COR_M$  is based on MA lines. (C) Distributions for fly when  $COR_M$  is based on MA lines. The distributions for  $COR_M$  and  $COR_E$  are significantly different in each panel ( $P < 10^{-10}$  in A and B and  $P = 0.0015$  in C, Kolmogorov–Smirnov test).



A

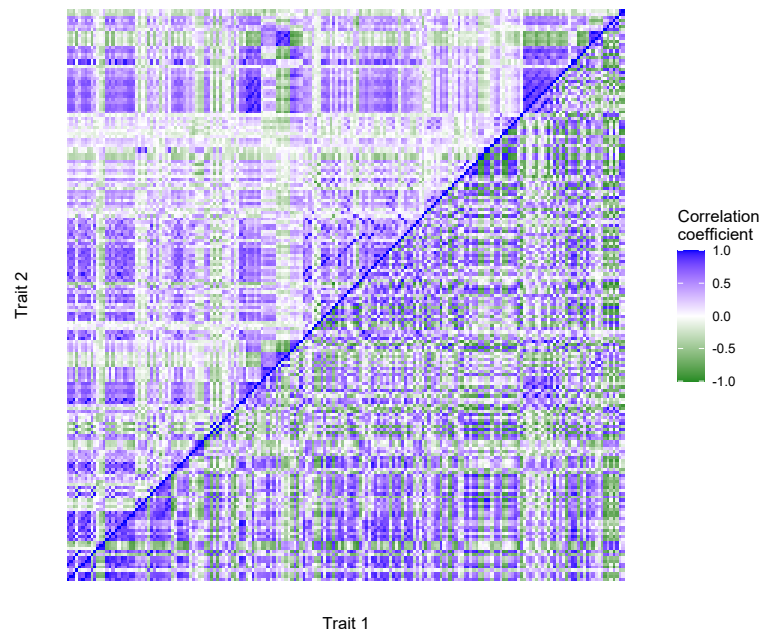

B

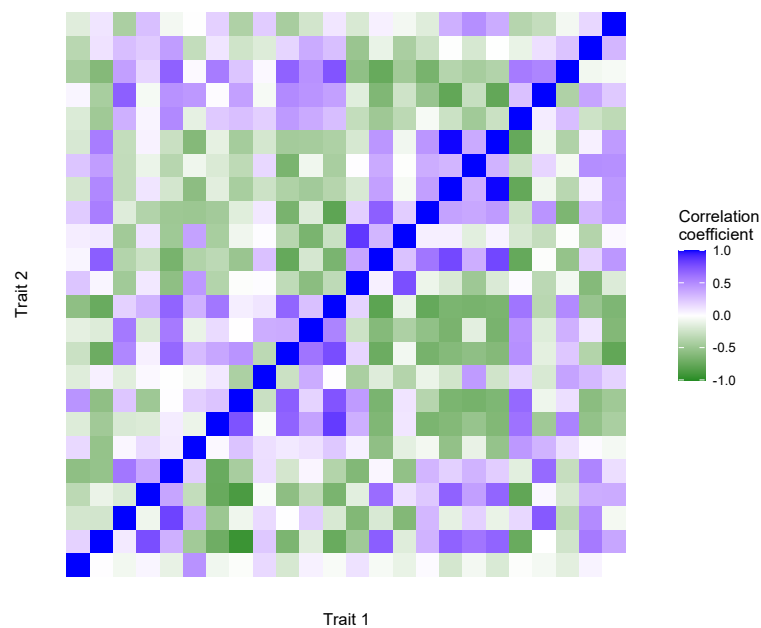

**Fig. S3.** Mutational (upper triangle) and evolutionary (lower triangle) correlation matrices for (A) the 187 yeast traits measured in MA lines, which are ordered according to their IDs, and (B) the 24 fly traits, which are ordered in the same way as in the original dataset.
